# Supplementary material for: Airways to Alteration (A2A): a randomised-controlled trial exploring effects of breathwork on conscious state
Source: Research Square preprint supplement (doi:10.21203/rs.3.rs-7254002/v1), 2025-11-18

## Supplementary material

### **Airways to Alteration (A2A): a randomised-controlled trial exploring effects of breathwork on conscious state**

Guy W. Fincham<sup>1\*</sup>, Edward Caddy<sup>1</sup>, Amy A. Kartar<sup>1</sup>, Elizabeth A. Lilley<sup>2</sup>, Nicola Stoke<sup>3</sup>, Alessandro Colasanti<sup>1,4</sup>

<sup>1</sup> Breathwork Lab, Department of Clinical Neuroscience, Brighton & Sussex Medical School, UK

<sup>2</sup> Psychoactive Trials Group, Institute of Psychiatry, Psychology & Neuroscience, Kings College London, UK

<sup>3</sup> Independent Scholar, UK

<sup>4</sup> Sussex Partnership NHS Foundation Trust, UK

\* Corresponding author

**Supplementary Figure 1.** Study participant flow.

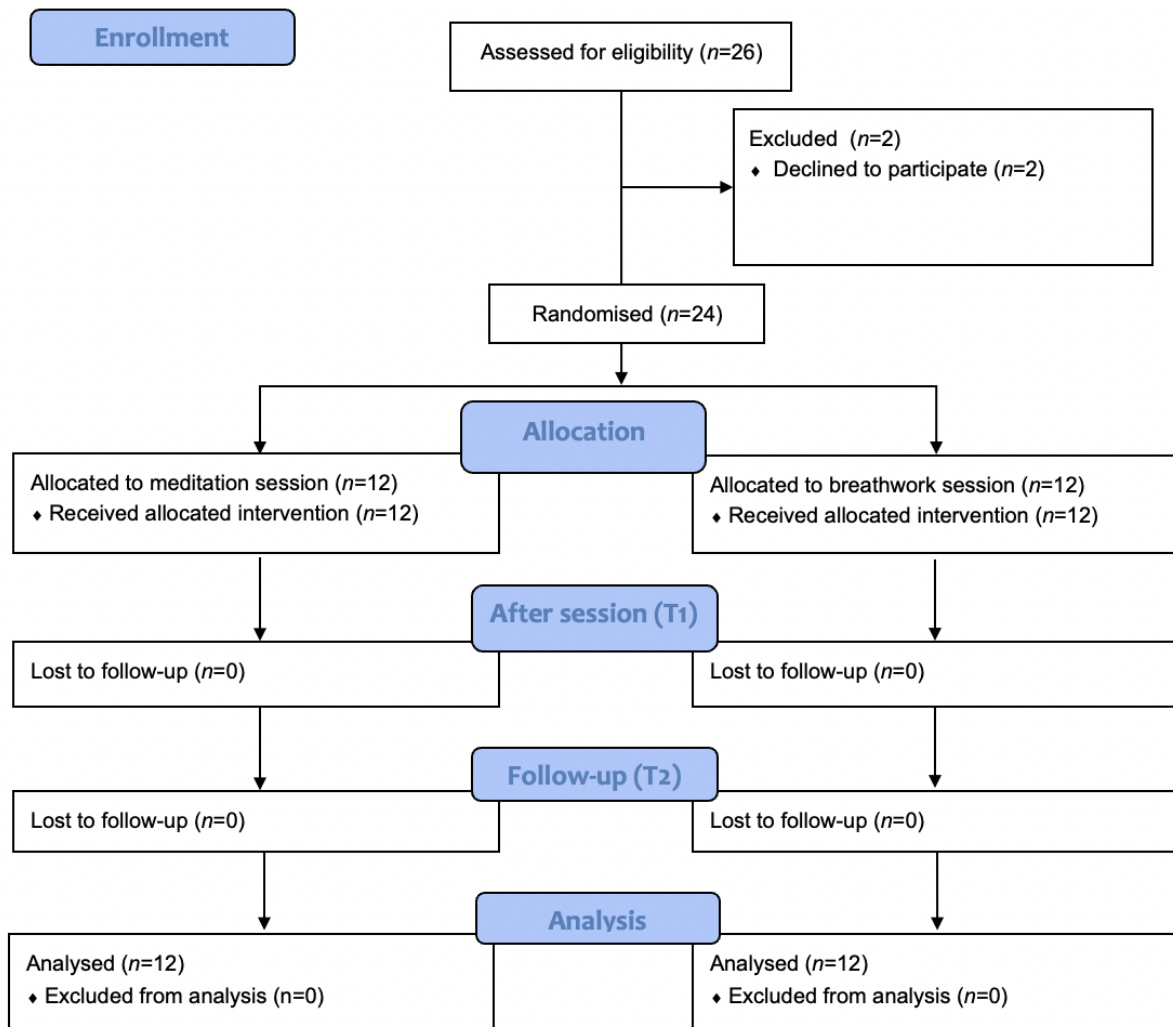

**Supplementary Figure 2.** Mean 11-Dimensions of Altered States of Consciousness Scale scores by intervention, with scores averaged across participants for each subscale. Adapted from Havenith et al.<sup>6</sup> using their breathwork interventions (90-min and 180-min), along with data extracted by the authors from the Altered States Database<sup>12</sup>: Psilocybin oral (scores pooled across five relevant clinical studies), LSD oral/intravenous (pooled across six studies) and 0.125 mg MDMA oral (five studies), along with placebo treatments (three clinical studies). Green and orange thick solid lines highlight our current study's 90-min breathwork and 40-min meditation groups, respectively.

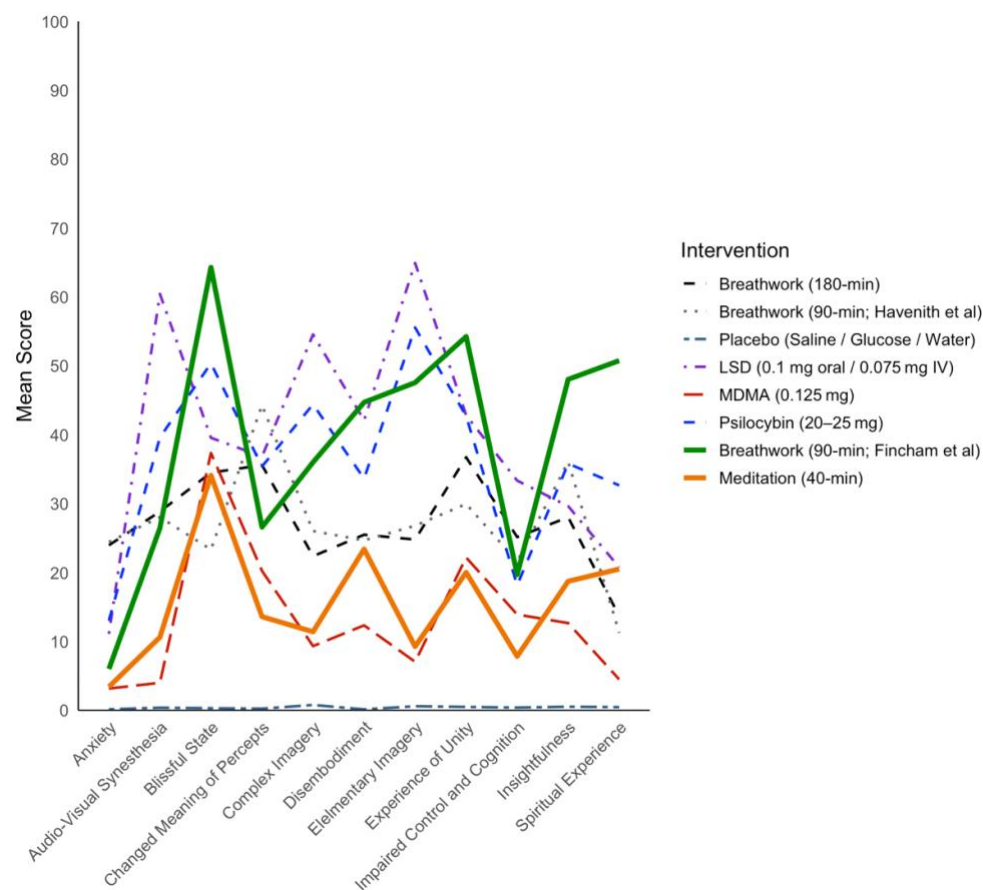

**Supplementary Figure 3.** Phenomenological profiles of breathwork and meditation compared to dose-dependent phenomenological profiles of psilocybin on 11-Dimensions of Altered States of Consciousness Scale mean scores. Adapted from Bahi et al.<sup>9</sup> using data extracted by the authors from the Altered States Database<sup>12</sup>, along with their 45-min breathwork intervention. Data from our current study are represented by green (90-min breathwork) and orange (40-min meditation) thick solid lines.

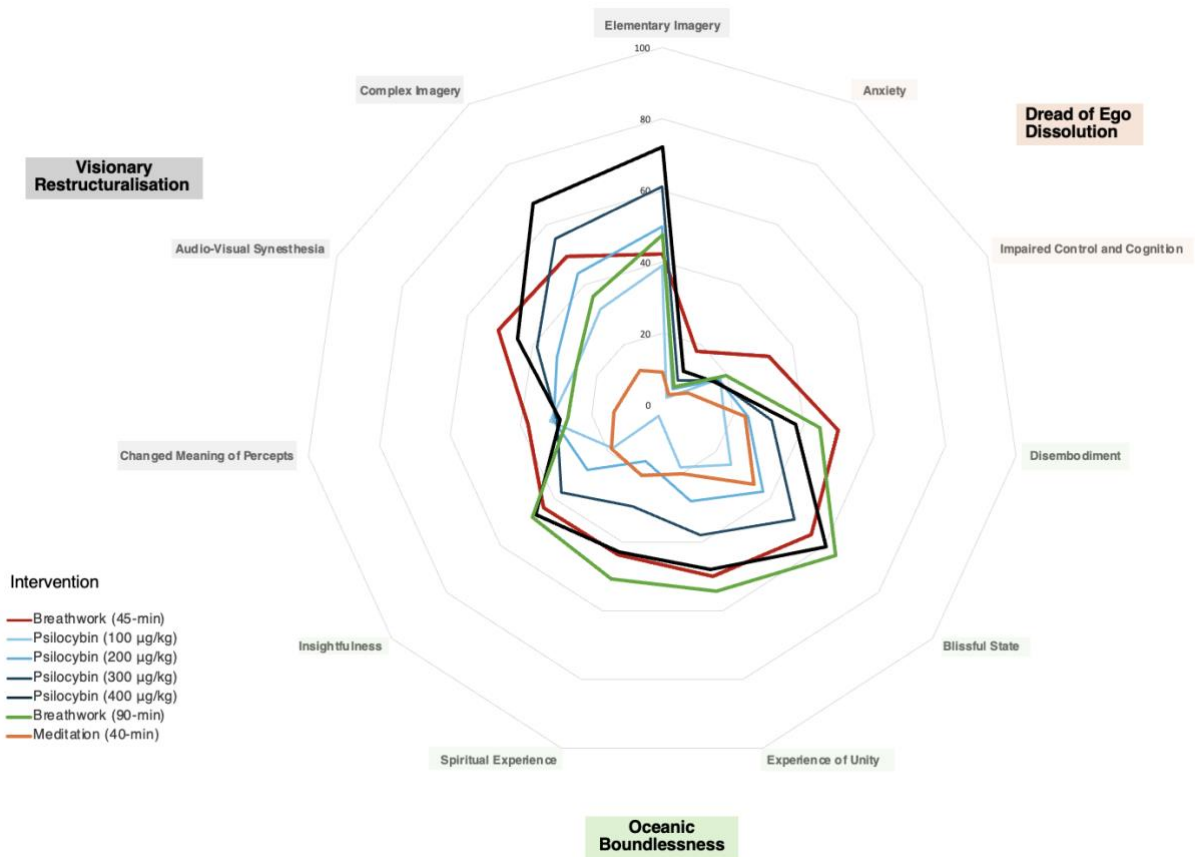

Supplement: Supplementary file 1 [file 1186a442d97996b383fada1d.pdf]
